# Supplementary material
Source: Springer Nature journal article supplement (https://www.springermedizin.de/resource/supplementary/13052_2010_123_MOESM1_ESM.pdf/9671448)

# Normal hearing children

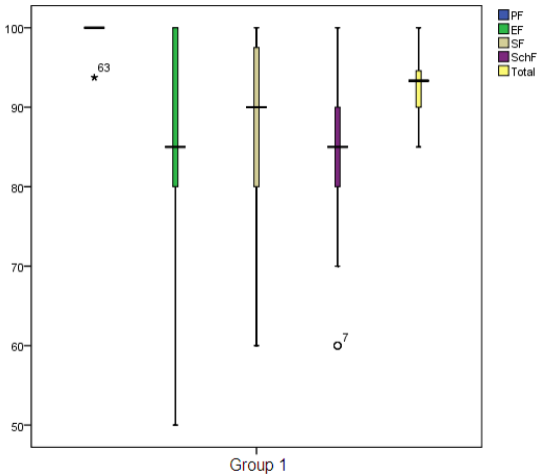

Supplement: MOESM1 [file 9671448]
